# Supplementary material for: B cell epitope of human cytomegalovirus phosphoprotein 65 (HCMV pp65) induced anti-dsDNA antibody in BALB/c mice
Source: PubMed Central journal article supplement (PMC5359867; doi:10.1186/s13075-017-1268-2), 2017-03-21
Supplement: 13075_2017_1268_MOESM1_ESM.pdf [file 13075_2017_1268_MOESM1_ESM.pdf]

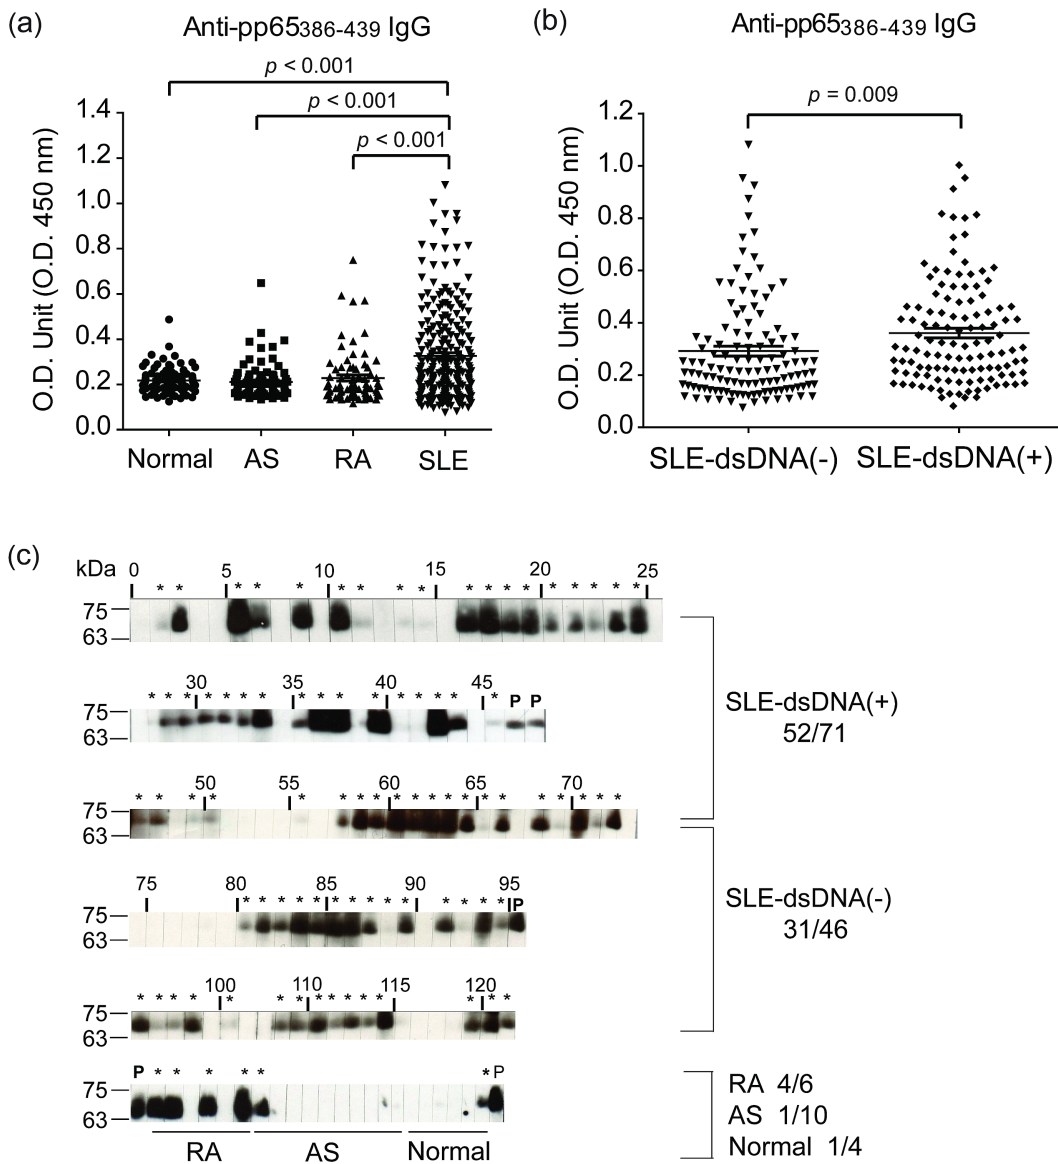

**Additional file 1. Detection of IgG against pp65<sub>386-439</sub> from sera of SLE, RA and normal control.** (a) ELISA assays for IgG against pp65<sub>386-439</sub> with sera from SLE ( $n=238$ ), AS ( $n=86$ ), RA ( $n=78$ ) and normal healthy ( $n=84$ ).  $1\mu\text{g/well}$  pp65<sub>386-439</sub> and 250x diluted human sera were used in tests. (b) The IgG against pp65<sub>386-439</sub> with sera from SLE-dsDNA(+) and SLE-dsDNA(-) ( $0.361 \pm 0.018$  vs.  $0.292 \pm 0.019$ ,  $P = 0.009$ ). (c) Reconfirmation of pp65<sub>386-439</sub> seropositive sera by western blotting. Full-length pp65 antigen ( $40\mu\text{g/per slab gel}$ ) and 1000x diluted sera were used for tests. In the ELISA assays, the positivity was defined by mean + 3xSEM of normal sera.  $\text{OD}_{450} > 0.250$  was considered to be positive. ELISA-based results revealed that 71 SLE-dsDNA(+), 46 SLE-dsDNA(-), 10 AS, 6 RA, and 4 normal healthy were positive for pp65<sub>386-439</sub>. Among them, 52 SLE-dsDNA(+) (52/119, 43.70%), 31 SLE-dsDNA(-) (31/119, 26.05%), 1 AS (1/86, 1.16%), 4 RA (4/78, 5.13%) and 1 normal healthy (1/84, 1.19%) exhibited anti-pp65 reactivity in western blotting results, which are consistent to the anti-pp65<sub>386-439</sub> antibody titers examined in ELISA tests. Star marks (\*) indicate sera are positive for pp65. Molecular mass markers (kD) are shown on the left. MW: molecular weight. kDa: kilodalton. Data are presented as the mean ± SEM of three independent experiments
