# Supplementary material for: B cell epitope of human cytomegalovirus phosphoprotein 65 (HCMV pp65) induced anti-dsDNA antibody in BALB/c mice
Source: PubMed Central journal article supplement (PMC5359867; doi:10.1186/s13075-017-1268-2), 2017-03-21
Supplement: 13075_2017_1268_MOESM2_ESM.pdf [file 13075_2017_1268_MOESM2_ESM.pdf]

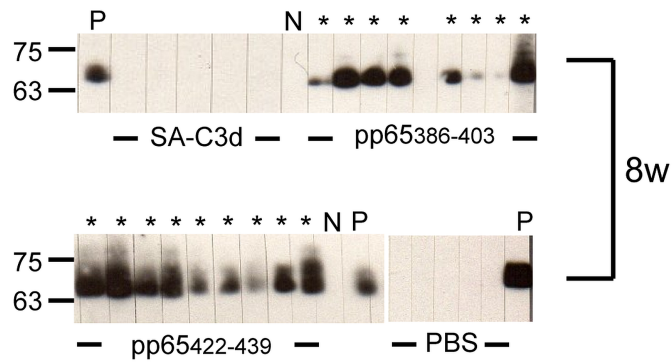

**Additional file 2. Detection of anti-pp65 reactivity from pp65<sub>386-403</sub>, pp65<sub>422-439</sub>, SA-C3d and PBS immunized sera.** Immunoblot assay with sera from pp65<sub>386-403</sub> ( $n=9$ ), pp65<sub>422-439</sub> ( $n=9$ ), SA-C3d ( $n=5$ ) and PBS ( $n=5$ ) immunized mice against full-length pp65 at 8 weeks post immunization. Sera were used for tests at 1:250 dilution. P: positive control, 5000x diluted Rabbit anti-His tag antibody, N: negative control, 100x diluted normal serum. Secondary antibody: HRP conjugated anti-mouse/rabbit/human IgG antibody.
