# Supplementary material for: B cell epitope of human cytomegalovirus phosphoprotein 65 (HCMV pp65) induced anti-dsDNA antibody in BALB/c mice
Source: PubMed Central journal article supplement (PMC5359867; doi:10.1186/s13075-017-1268-2), 2017-03-21
Supplement: 13075_2017_1268_MOESM4_ESM.pdf [file 13075_2017_1268_MOESM4_ESM.pdf]

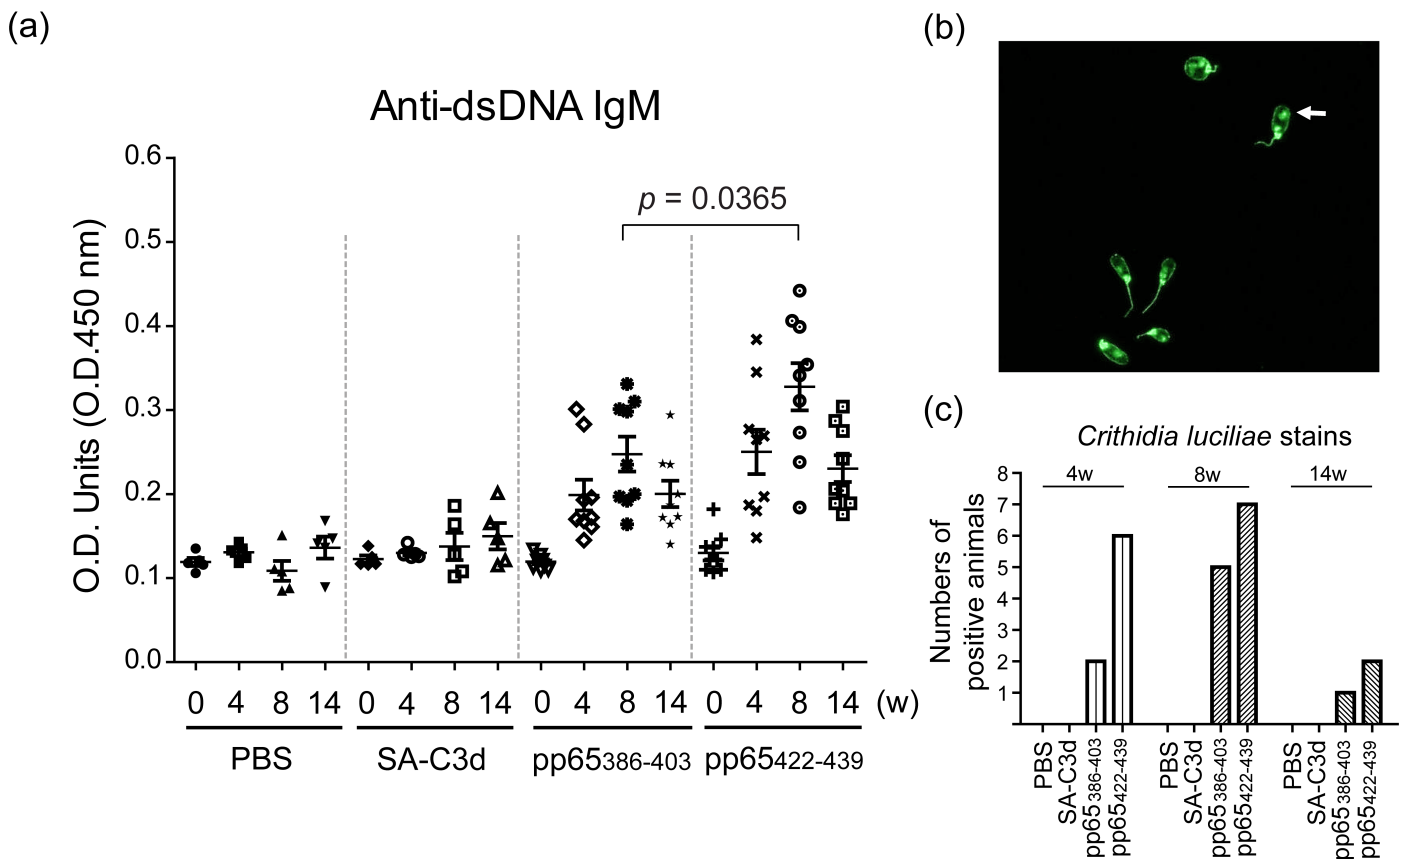

**Additional file 4. Detection of IgM anti-dsDNA antibody in PBS, SA-C3d, pp65<sub>386-403</sub> and pp65<sub>422-439</sub> immunized sera.** (a) ELISA assay for IgM anti-dsDNA antibody activity from pp65<sub>422-439</sub> ( $n=9$ ), pp65<sub>386-403</sub> ( $n=9$ ), SA-C3d ( $n=5$ ) and PBS ( $n=5$ ) immunized mice sera. 250x diluted sera were used in ELISA assays for anti-dsDNA reactivity. (b) Representatives of *Crithidia luciliae* stain by sera from pp65<sub>422-439</sub> mice sera at dilution of 1:80. White arrowheads indicate dsDNA positive stains. (c) Numbers of *Crithidia luciliae* positive animals at 4, 8 and 14 weeks post immunization. These results are representative of triplicated experiments. Data are presented as the mean  $\pm$  SEM of three independent experiments
