# Supplementary material for: B cell epitope of human cytomegalovirus phosphoprotein 65 (HCMV pp65) induced anti-dsDNA antibody in BALB/c mice
Source: Springer Nature journal article supplement (doi:10.1186/s13075-017-1268-2), 2017-03-21
Supplement: MOESM3 [file 12157864]

### Summary of ANA patterns in mice against cellular components

| Nuclear pattern      | PBS<br><i>n</i> =5 | SA-C3d<br><i>n</i> =5 | pp65 <sub>386-403</sub><br><i>n</i> =9 | pp65 <sub>422-439</sub><br><i>n</i> =9 |
|----------------------|--------------------|-----------------------|----------------------------------------|----------------------------------------|
| Centriole            | 0                  | 0                     | 0                                      | 5                                      |
| Cytoplasmic proteins | 0                  | 0                     | 3                                      | 7                                      |
| MSA I                | 0                  | 0                     | 0                                      | 6                                      |
| MSA II               | 0                  | 0                     | 0                                      | 7                                      |
| Nuclear dots         | 0                  | 0                     | 0                                      | 3                                      |
| Nuclear envelope     | 0                  | 0                     | 0                                      | 3                                      |
| Nuclear rim          | 0                  | 0                     | 0                                      | 4                                      |
| Nucleosome/chromatin | 0                  | 0                     | 0                                      | 4                                      |
| Speckled pattern     | 0                  | 0                     | 0                                      | 6                                      |

MSA I: mitotic spindle type I; MSA II: mitotic spindle type II.

### Summary of isotypes of antibody deposition on glomeruli

| Antibody isotypes                                     | PBS<br><i>n</i> =5      | SA-C3d<br><i>n</i> =5 | pp65 <sub>386-403</sub><br><i>n</i> =9 | pp65 <sub>422-439</sub><br><i>n</i> =9 |
|-------------------------------------------------------|-------------------------|-----------------------|----------------------------------------|----------------------------------------|
| IgG+IgM                                               | 0                       | 0                     | 0                                      | 4                                      |
| IgM alone                                             | 0                       | 0                     | 2                                      | 1                                      |
| IgG alone                                             | 0                       | 0                     | 0                                      | 2                                      |
| All negative                                          | 5                       | 5                     | 7                                      | 2                                      |
| IgG subclasses                                        | pp65 <sub>422-439</sub> |                       |                                        |                                        |
| IgG <sub>1</sub> +IgG <sub>2a</sub> +IgG <sub>3</sub> | 2                       |                       |                                        |                                        |
| IgG <sub>1</sub> +IgG <sub>2b</sub> +IgG <sub>3</sub> | 1                       |                       |                                        |                                        |
| IgG <sub>1</sub> +IgG <sub>3</sub>                    | 1                       |                       |                                        |                                        |
| IgG <sub>1</sub>                                      | 2                       |                       |                                        |                                        |

These results are representative of triplicated experiments.
